# Supplementary material for: Three new Zn(ii) coordination polymers for highly selective and sensitive detection of Fe3+
Source: Royal Society of Chemistry journal article supplement (doi:10.1039/d2ce01382g), 2022-12-09
Supplement: d2ce01382g1.pdf [file d2ce01382g1.pdf]

### Limit of detection (LOD) calculations

The standard deviation ( $\sigma$ ) from repeated fluorescence intensity measurements in blank solutions 10 times was calculated using the following equation.

$$\sigma = \sqrt{\frac{\sum \left(1 - \frac{I_0}{I_1}\right)^2}{N-1}} \quad (N=10)$$

where  $\sigma$  is the standard deviation for repeated detections of blank solutions, and  $I_1$  is the average of  $I_0$ .

The LOD value was calculated using the following equation.

$$LOD = \frac{3\sigma}{K_{SV}}$$

where LOD is the limit of detection, and  $K_{sv}$  is the Stern-Volmer constant.

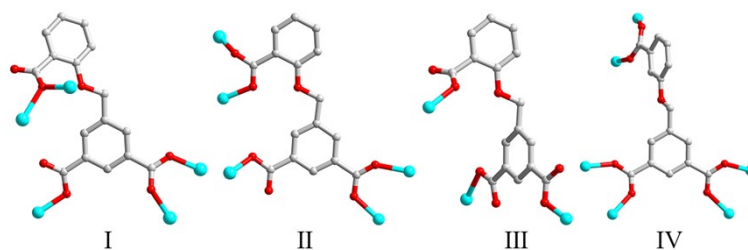

**Scheme S1** Coordination modes of  $L1^{3-}$  and  $L2^{3-}$ .

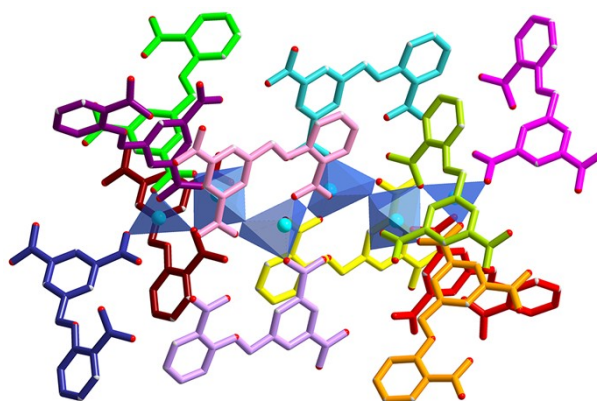

(a)

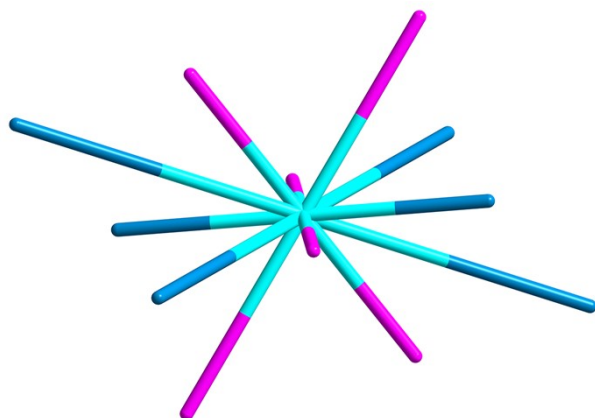

(b)

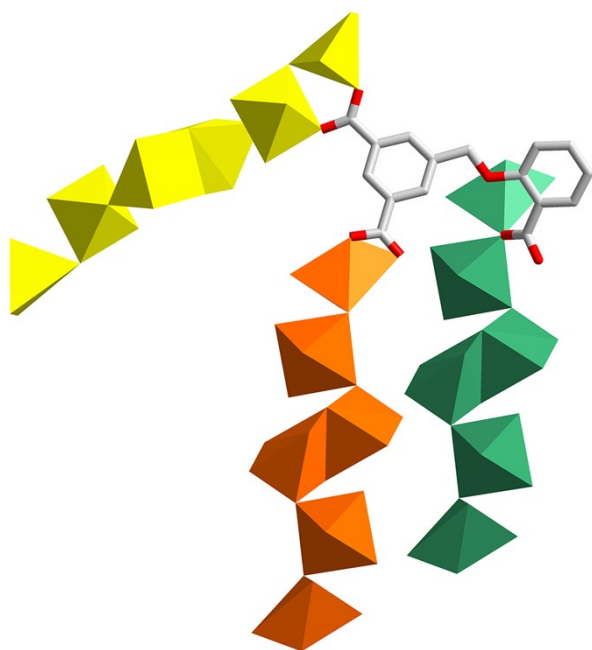

(c)

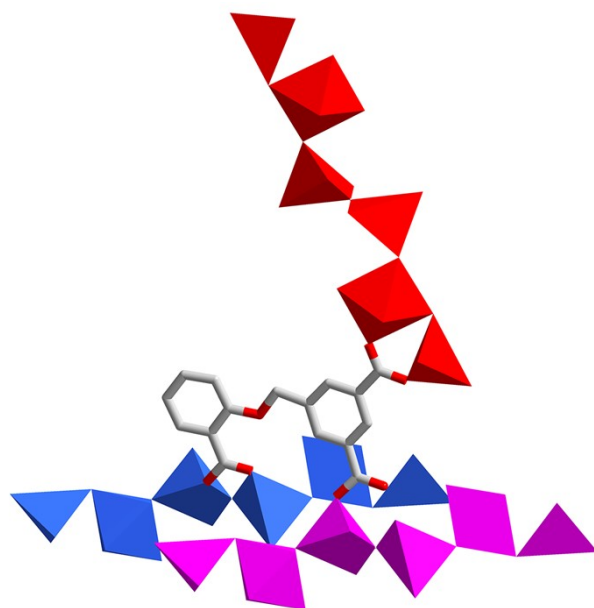

(d)

**Fig. S1** (a) View of the hexanuclear Zn(II) cluster. (b) View of the 12-connected node simplified by the hexanuclear Zn(II) cluster. (c) and (d) View of the  $L1^{3-}$  ligand surrounded by three hexanuclear Zn(II) clusters.

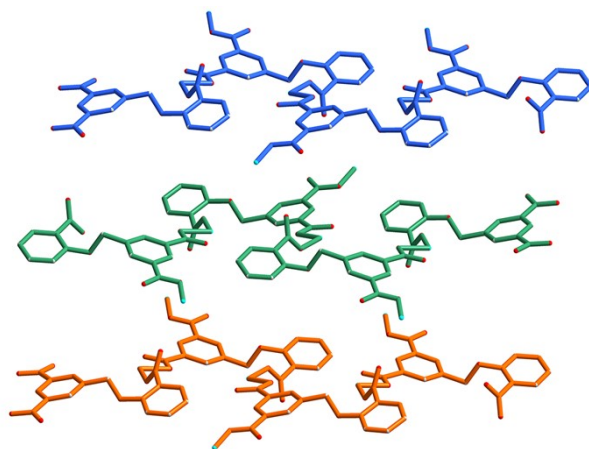

(a)

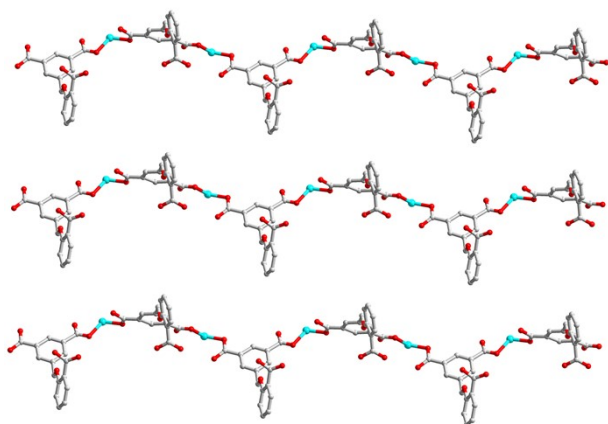

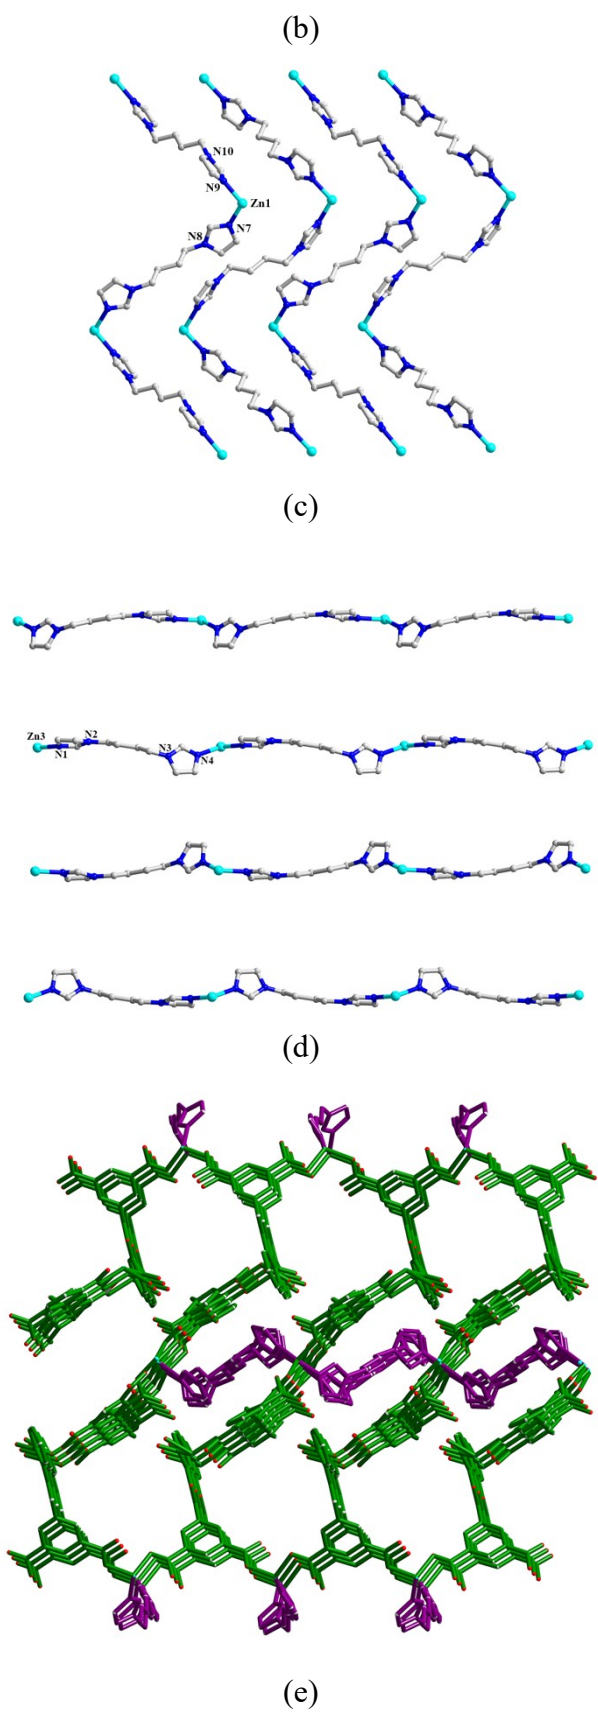

**Fig. S2** (a-d) View of the 1D chains constructed by Zn(II) ions and different ligands.  
(e) View of the 2D framework.

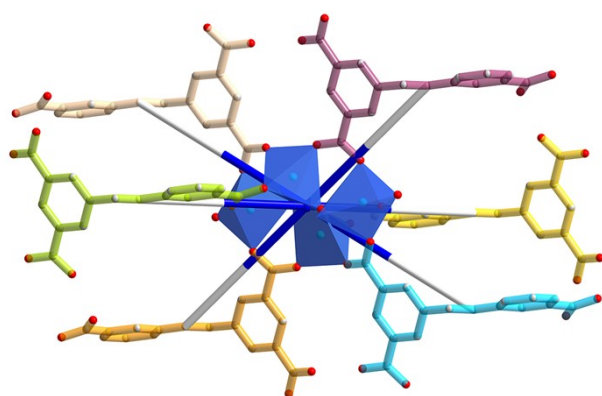

(a)

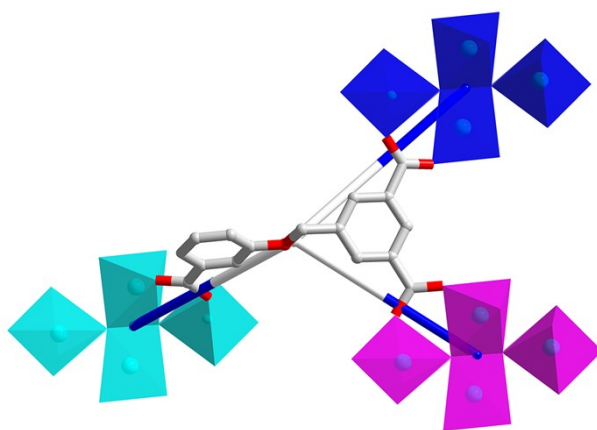

(b)

**Fig. S3** (a) and (b) Representation of 3- and 6-connected nodes.

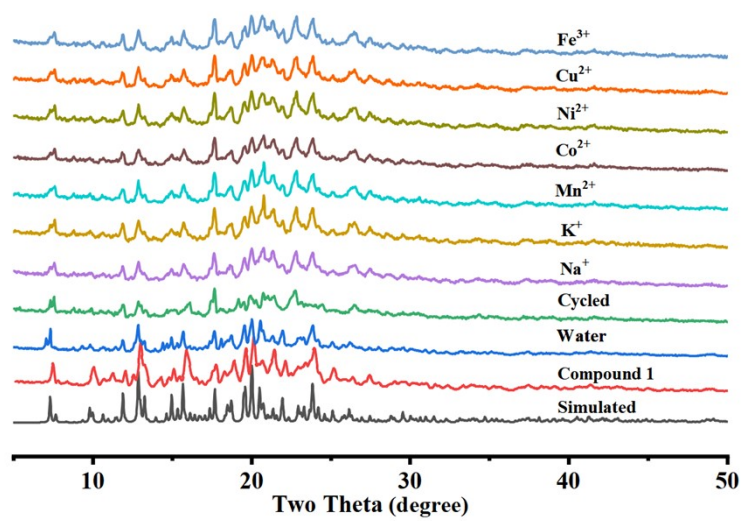

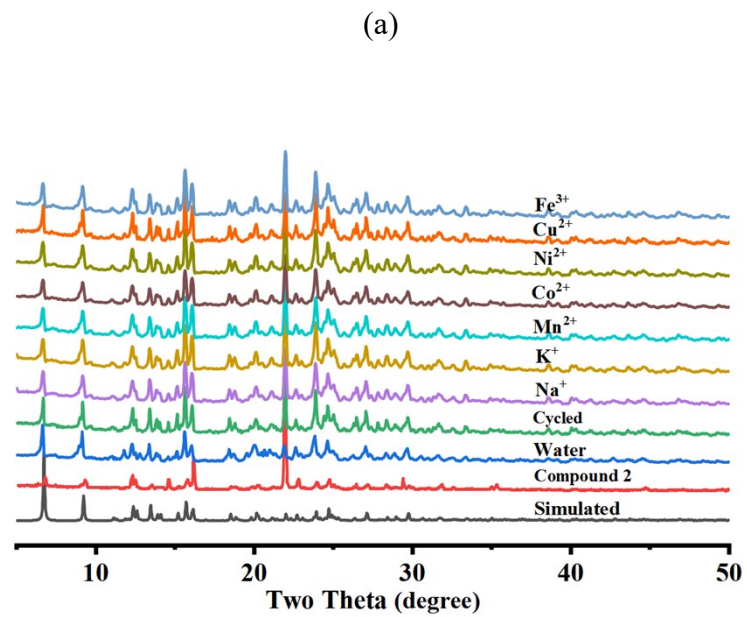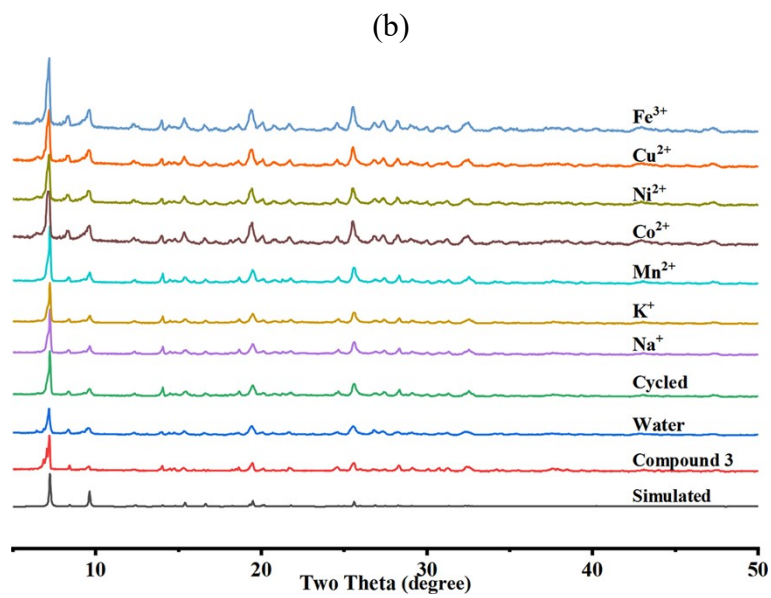

(c)

**Fig. S4** Simulated PXRD patterns of **1-3** (black) and PXRD patterns of the as-synthesized samples (red).

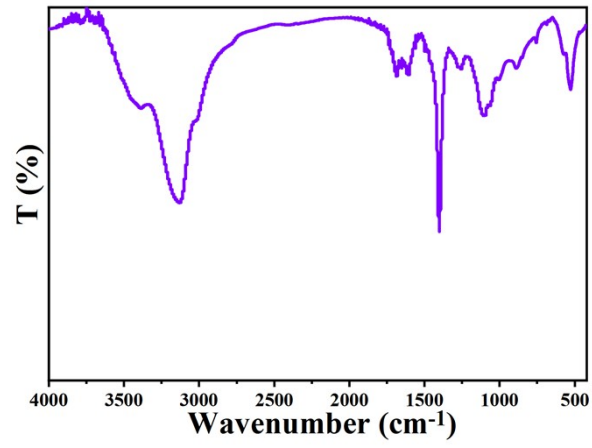

(a)

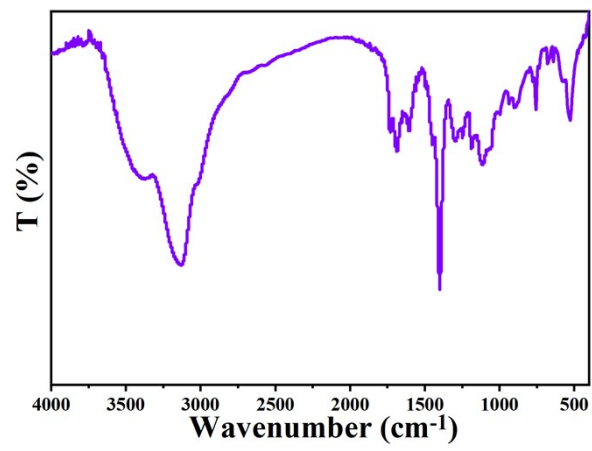

(b)

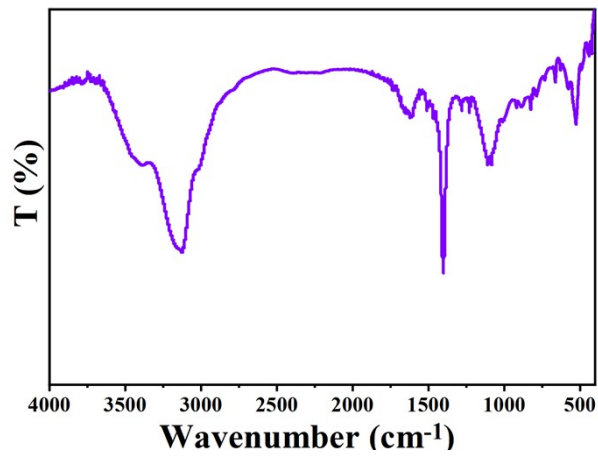

(c)

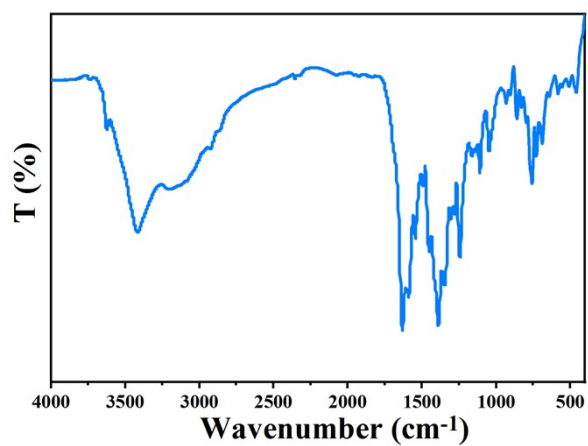

(d)

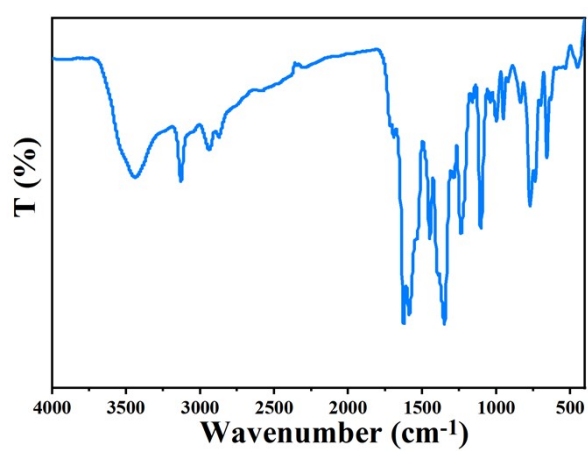

(e)

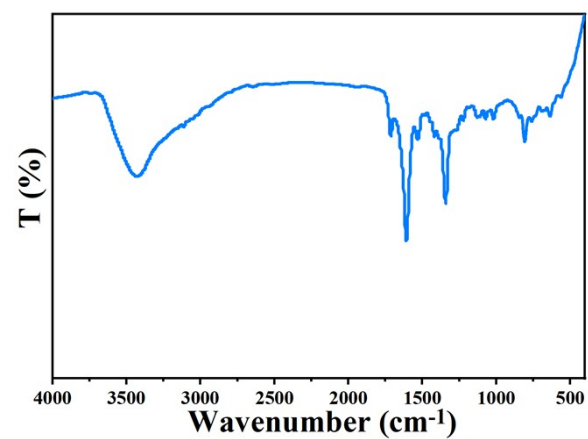

(f)

Fig. S5 IR spectra of H3L1 (a), H3L2 (b), dib (c), and compounds **1-3** (d-f).



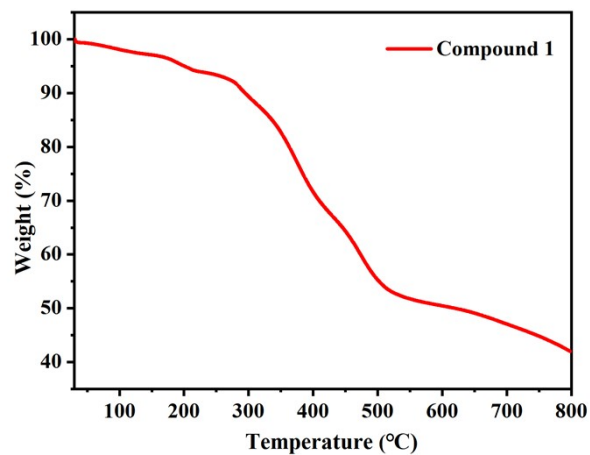

(a)

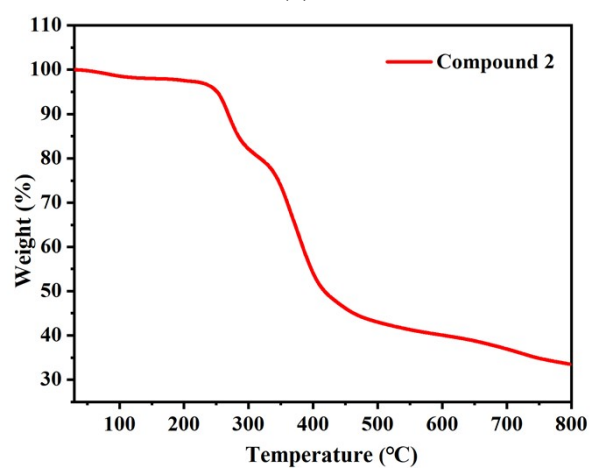

(b)

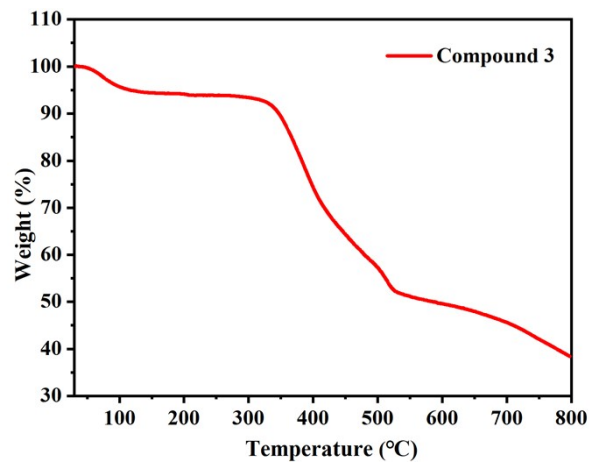

(c)

**Fig. S6** TG curves of compounds 1-3.

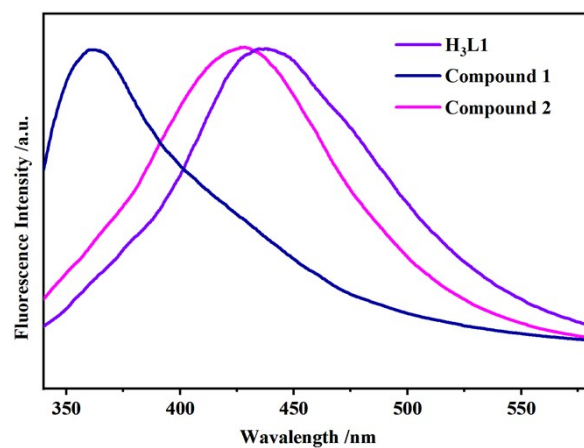

(a)

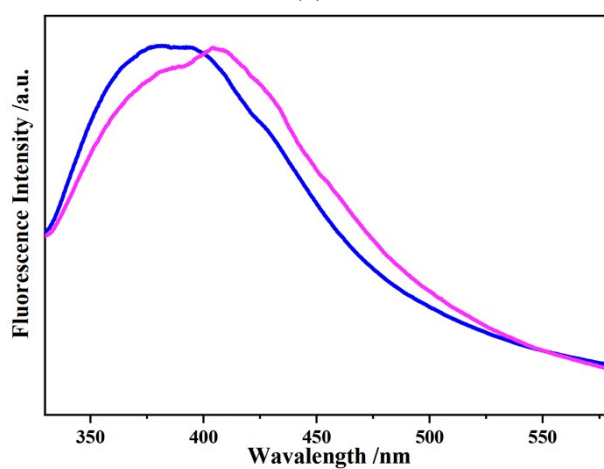

(b)

**Fig. S7** Solid-state emission spectra of compounds **1-3** and organic ligands at room temperature.

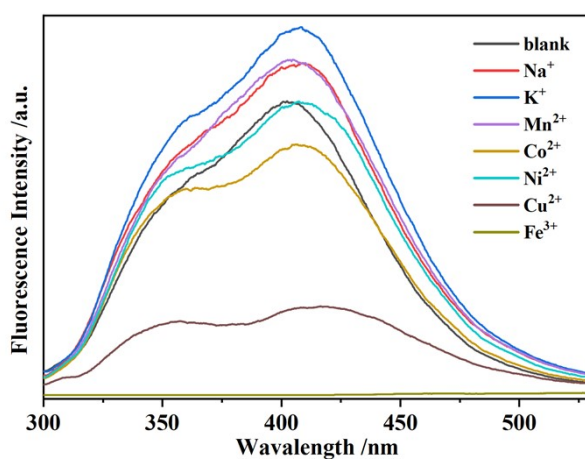

(a)

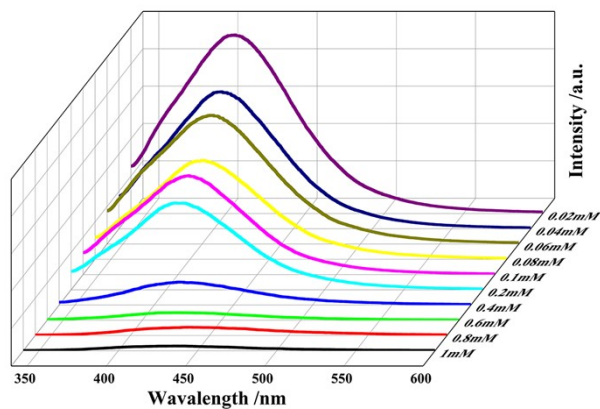

(b)

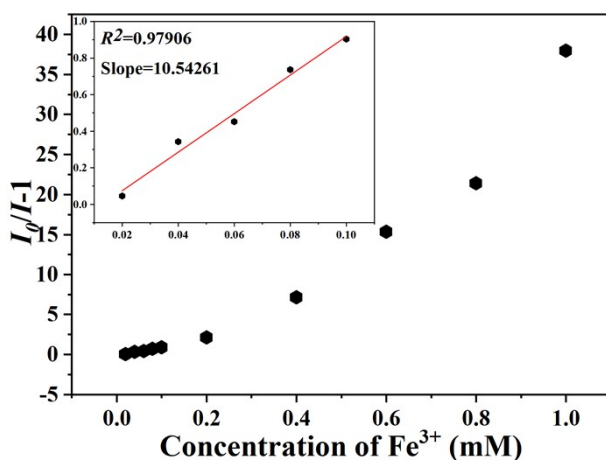

(c)

**Fig. S8** (a) Emission spectra of compound **2** in different cationic solutions at room temperature. (b) Emission intensity spectra of compound **2** under different  $\text{Fe}^{3+}$  ion concentrations. (c) Stern-Volmer plots (inset: Stern-Volmer plots at low concentrations).

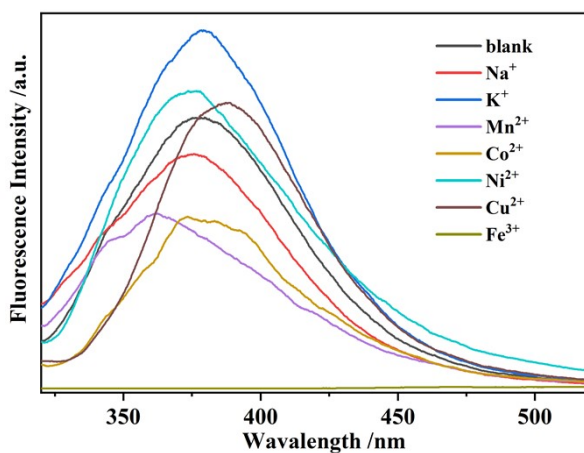

(a)

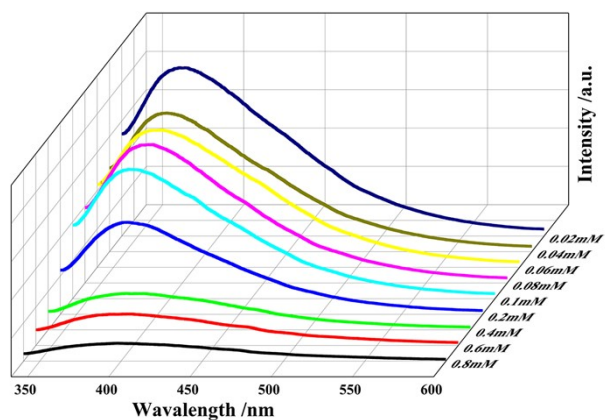

(b)

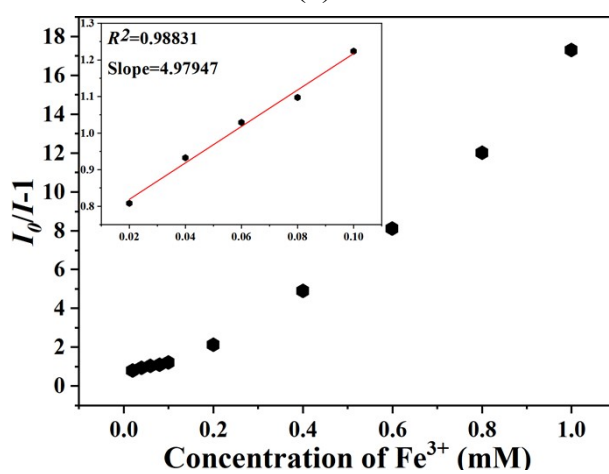

(c)

**Fig. S9** (a) Emission spectra of compound **3** in different cationic solutions at room temperature. (b) Emission intensity spectra of compound **3** under different  $\text{Fe}^{3+}$  ion concentrations. (c) Stern-Volmer plots (inset: Stern-Volmer plots at low concentrations).

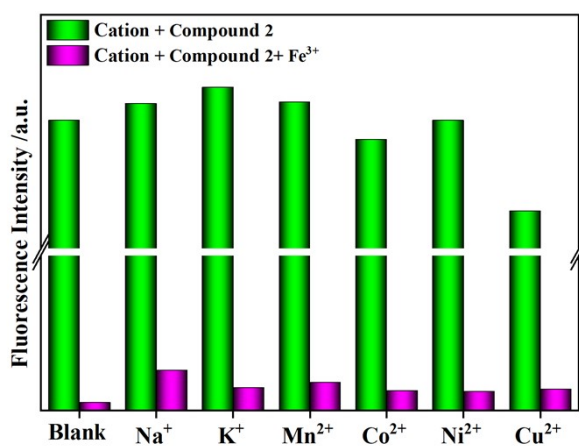

(a)

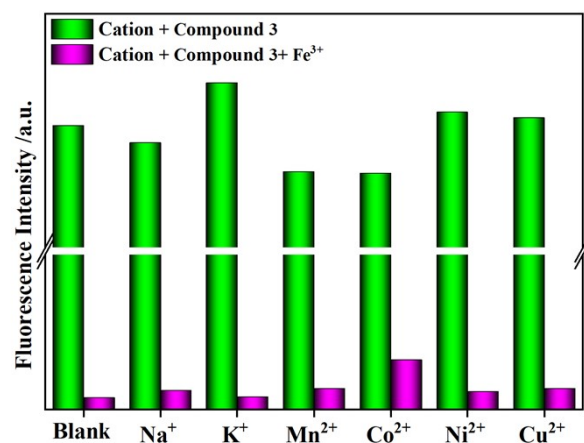

(b)

**Fig. S10** The anti-interference performance of compounds **2** and **3** for Fe<sup>3+</sup> detection in the presence of different anions.

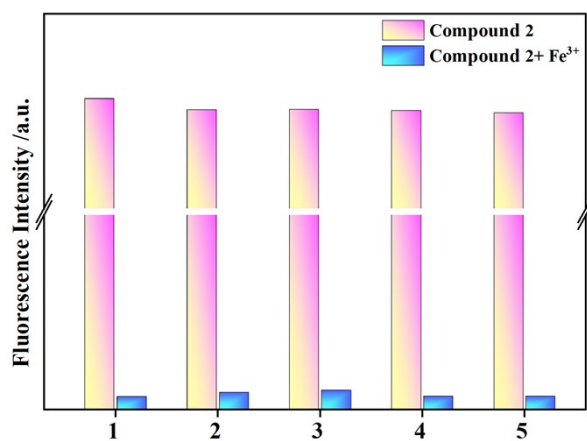

(a)

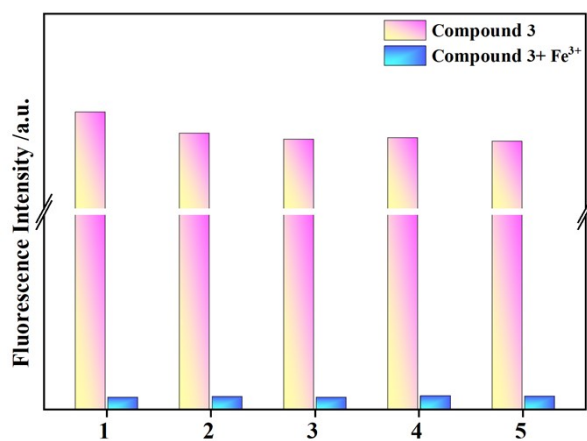

(b)

**Fig. S11** Recyclability tests of compounds **2** and **3** for Fe<sup>3+</sup> detection.

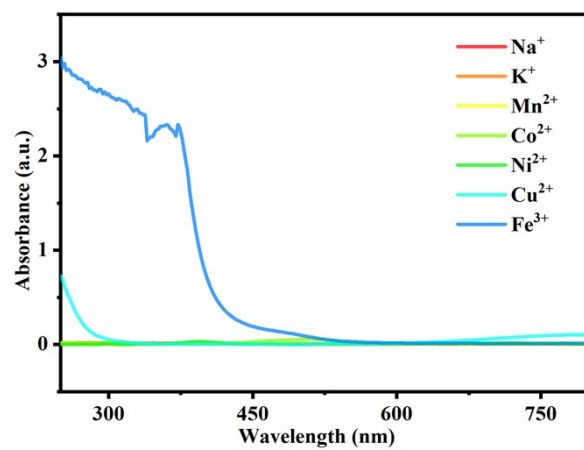

**Fig. S12** The UV-Vis absorption spectra of cation solvents.

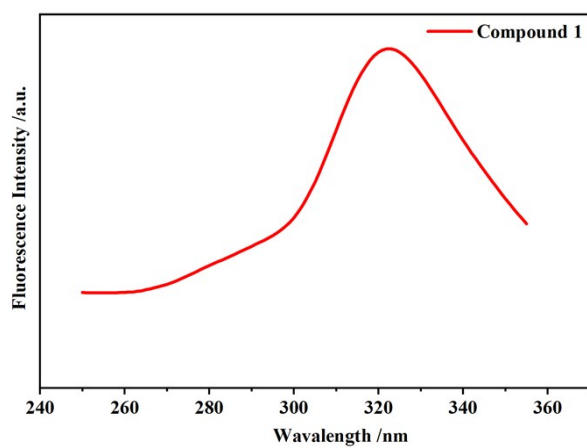

(a)

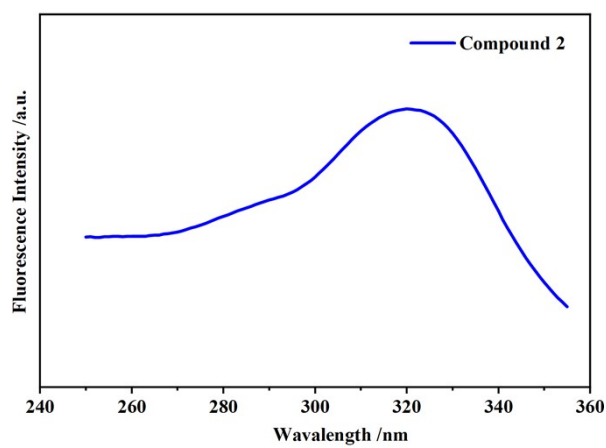

(b)

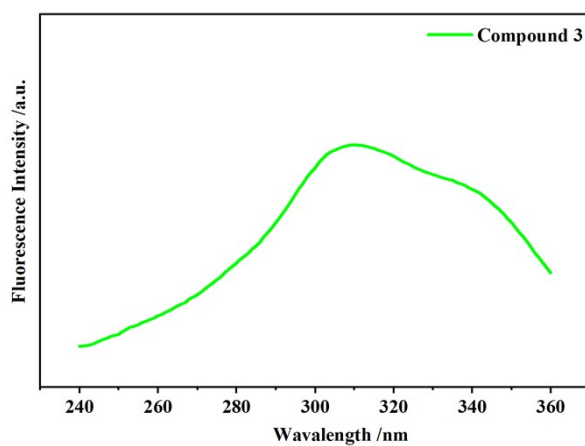

(c)

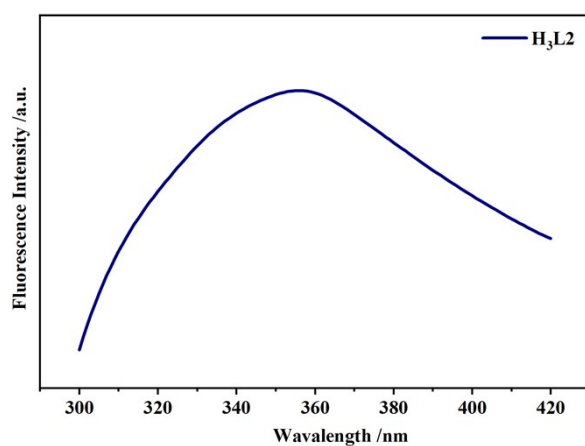

(d)

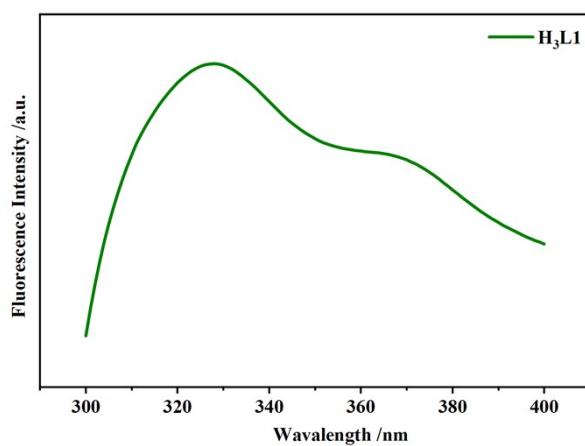

(e)

**Fig. S13** The excitation spectra of compounds **1-3**, H<sub>3</sub>L1, and H<sub>3</sub>L2 in the solid state.

**Table S1** Crystallographic data for compounds **1-3**

| Compound  | 1                                                                 | 2                                                                                 | 3                                                                 |
|-----------|-------------------------------------------------------------------|-----------------------------------------------------------------------------------|-------------------------------------------------------------------|
| Empirical | C <sub>32</sub> H <sub>25</sub> O <sub>17.5</sub> Zn <sub>3</sub> | C <sub>57</sub> H <sub>55</sub> N <sub>10</sub> O <sub>15.5</sub> Zn <sub>3</sub> | C <sub>16</sub> H <sub>13</sub> O <sub>9.50</sub> Zn <sub>2</sub> |

| formula                                 |                                                                     |                                                                      |                                                                     |
|-----------------------------------------|---------------------------------------------------------------------|----------------------------------------------------------------------|---------------------------------------------------------------------|
| Formula weight                          | 885.63                                                              | 1325.22                                                              | 488.00                                                              |
| Temperature/K                           | 293.15                                                              | 293.15                                                               | 293.15                                                              |
| Crystal system                          | monoclinic                                                          | monoclinic                                                           | triclinic                                                           |
| Space group                             | $P2_1/n$                                                            | $P2_1/c$                                                             | $P-1$                                                               |
| a/Å                                     | 8.4102(2)                                                           | 24.416(2)                                                            | 7.1877(3)                                                           |
| b/Å                                     | 24.2114(6)                                                          | 13.1343(13)                                                          | 10.8583(4)                                                          |
| c/Å                                     | 15.6405(4)                                                          | 18.2143(19)                                                          | 12.6345(5)                                                          |
| $\alpha/^\circ$                         | 90                                                                  | 90                                                                   | 104.4760(10)                                                        |
| $\beta/^\circ$                          | 91.320(1)                                                           | 97.684(3)                                                            | 91.4000(10)                                                         |
| $\gamma/^\circ$                         | 90                                                                  | 90                                                                   | 94.0910(10)                                                         |
| Volume/Å <sup>3</sup>                   | 3183.92(14)                                                         | 5788.7(10)                                                           | 951.42(7)                                                           |
| Z                                       | 4                                                                   | 4                                                                    | 2                                                                   |
| $\rho_{\text{calc}}/\text{cm}^3$        | 1.85                                                                | 1.519                                                                | 1.703                                                               |
| $\mu/\text{mm}^{-1}$                    | 2.329                                                               | 1.311                                                                | 2.569                                                               |
| Independent reflections                 | 5818 [ $R_{\text{int}} = 0.0432$ ,<br>$R_{\text{sigma}} = 0.0309$ ] | 10556 [ $R_{\text{int}} = 0.0482$ ,<br>$R_{\text{sigma}} = 0.0349$ ] | 3471 [ $R_{\text{int}} = 0.0165$ ,<br>$R_{\text{sigma}} = 0.0087$ ] |
| Goodness-of-fit on F <sup>2</sup>       | 1.07                                                                | 1.044                                                                | 1.087                                                               |
| Final R indexes [ $I \geq 2\sigma(I)$ ] | $R_1 = 0.0355$ , $wR_2 = 0.0984$                                    | $R_1 = 0.0606$ , $wR_2 = 0.1598$                                     | $R_1 = 0.0248$ , $wR_2 = 0.0841$                                    |
| Final R indexes [all data]              | $R_1 = 0.0443$ , $wR_2 = 0.1048$                                    | $R_1 = 0.0843$ , $wR_2 = 0.1741$                                     | $R_1 = 0.0254$ , $wR_2 = 0.0846$                                    |

**Table S2 Selected bond lengths (Å) and bond angles (°) for 1**

| Bond          | Dist.      | Bond           | Dist.      |
|---------------|------------|----------------|------------|
| Zn1-O1        | 1.925(3)   | Zn2-O1W        | 2.031(3)   |
| Zn1-O4#3      | 1.985(3)   | Zn2-O2W        | 2.083(3)   |
| Zn1-O6#1      | 1.969(2)   | Zn2-O3W#2      | 2.277(3)   |
| Zn1-O8        | 1.969(3)   | Zn3-O11#1      | 1.930(3)   |
| Zn2-O3#3      | 2.011(3)   | Zn3-O13        | 1.926(3)   |
| Zn2-O6#1      | 2.252(2)   | Zn3-O14#3      | 1.994(3)   |
| Zn2-O9        | 2.016(3)   | Zn3-O3W        | 2.060(3)   |
| Angle         | (°)        | Angle          | (°)        |
| O4#3-Zn1-O1   | 112.41(12) | O2W-Zn2-O9     | 96.51(14)  |
| O6#1-Zn1-O1   | 130.42(11) | O2W-Zn2-O1W    | 93.71(15)  |
| O6#1-Zn1-O4#3 | 104.75(11) | O3W#2-Zn2-O3#3 | 90.81(10)  |
| O8-Zn1-O1     | 98.54(12)  | O3W#2-Zn2-O6#1 | 83.31(9)   |
| O8-Zn1-O4#3   | 99.54(12)  | O3W#2-Zn2-O9   | 174.10(12) |
| O8-Zn1-O6#1   | 106.59(11) | O3W#2-Zn2-O1W  | 85.79(10)  |



|                                                                                                   |            |                 |            |
|---------------------------------------------------------------------------------------------------|------------|-----------------|------------|
| O6#1-Zn2-O3#3                                                                                     | 90.34(10)  | O3W#2-Zn2-O2W   | 86.15(13)  |
| O9-Zn2-O3#3                                                                                       | 94.59(12)  | O13-Zn3-O11#1   | 128.97(12) |
| O9-Zn2-O6#1                                                                                       | 94.25(11)  | O14#3-Zn3-O11#1 | 110.51(11) |
| O1W-Zn2-O3#3                                                                                      | 176.48(12) | O14#3-Zn3-O13   | 115.40(12) |
| O1W-Zn2-O62                                                                                       | 88.37(12)  | O3W-Zn3-O11#1   | 97.95(11)  |
| O1W-Zn2-O9                                                                                        | 88.77(12)  | O3W-Zn3-O13     | 97.30(11)  |
| O2W-Zn2-O3#3                                                                                      | 86.95(13)  | O3W-Zn3-O14#3   | 97.18(11)  |
| O2W-Zn2-O6#1                                                                                      | 169.07(13) |                 |            |
| #1: -x,2-y,1-z; #2: 1/2+x,3/2-y,-1/2+z; #3: -1-x,2-y,1-z; #4: -1+x,+y,+z; #5: -1/2+x,3/2-y,-1/2+z |            |                 |            |

**Table S3 Selected bond lengths (Å) and bond angles (°) for 2**

| Bond                                                                                                    | Dist.      | Bond           | Dist.      |
|---------------------------------------------------------------------------------------------------------|------------|----------------|------------|
| Zn1-O1                                                                                                  | 1.994(4)   | Zn2-O7         | 1.932(4)   |
| Zn1-N9                                                                                                  | 2.023(4)   | Zn2-N5         | 1.978(5)   |
| Zn1-O4#1                                                                                                | 1.970(4)   | Zn3-O12        | 2.057(7)   |
| Zn1-N7                                                                                                  | 2.004(4)   | Zn3-N1         | 2.037(6)   |
| Zn1-C1                                                                                                  | 2.565(5)   | Zn3-O13#2      | 1.946(6)   |
| Zn2-O8                                                                                                  | 1.976(4)   | Zn3-N4#3       | 2.022(7)   |
| Zn2-O1W                                                                                                 | 1.997(4)   |                |            |
| Angle                                                                                                   | (°)        | Angle          | (°)        |
| O1-Zn1-N9                                                                                               | 114.16(16) | O8-Zn2-N5      | 99.29(19)  |
| O1-Zn1-N7                                                                                               | 124.88(16) | O7-Zn2-O8      | 108.03(16) |
| O1-Zn1-C1                                                                                               | 28.95(16)  | O7-Zn2-O1W     | 111.15(18) |
| N9-Zn1-C1                                                                                               | 105.21(16) | O7-Zn2-N5      | 125.6(2)   |
| O4-Zn1-O1                                                                                               | 102.68(16) | N5-Zn2-O1W     | 108.8(2)   |
| O4#1-Zn1-N9                                                                                             | 95.13(15)  | N1-Zn3-O12     | 103.1(3)   |
| O4#1-Zn1-N7                                                                                             | 108.92(17) | O13#2-Zn3-O12  | 105.9(3)   |
| O4#1-Zn1-C1                                                                                             | 131.63(18) | O13#2-Zn3-N1   | 98.2(3)    |
| N7-Zn1-N9                                                                                               | 106.71(16) | O13#2-Zn3-N4#3 | 107.2(3)   |
| N7-Zn1-C1                                                                                               | 106.41(17) | N4#3-Zn3-O12   | 131.0(4)   |
| O8-Zn2-O1W                                                                                              | 100.26(17) | N4#3-Zn3-N1    | 106.9(3)   |
| #1: -x,1/2+y,3/2-z; #2: +x,1/2-y,1/2+z; #3: +x,-1+y,+z; #4: -x,1-y,2-z; #5: -x,1-y,1-z; #6: -1-x,-y,2-z |            |                |            |

**Table S4 Selected bond lengths (Å) and bond angles (°) for 3**

| Bond     | Dist.      | Bond     | Dist.    |
|----------|------------|----------|----------|
| Zn1-O1#1 | 2.0433(19) | Zn2-O1W  | 2.109(2) |
| Zn1-O4#2 | 2.0678(19) | Zn2-O2   | 1.982(2) |
| Zn1-O5   | 1.9560(19) | Zn2-O3#4 | 2.037(2) |

|                                                                   |            |               |            |
|-------------------------------------------------------------------|------------|---------------|------------|
| Zn1-O8#1                                                          | 2.0272(18) | Zn2-O6#3      | 1.983(2)   |
| Zn1-O8#3                                                          | 2.1119(18) | Zn2-O8        | 2.0157(18) |
| <b>Angle</b>                                                      | <b>(°)</b> | <b>Angle</b>  | <b>(°)</b> |
| O1#1-Zn1-O4#2                                                     | 90.90(9)   | O2-Zn2-O1W    | 102.54(9)  |
| O1#1-Zn1-O8#3                                                     | 92.17(7)   | O2-Zn2-O3#5   | 96.76(10)  |
| O4#2-Zn1-O8#3                                                     | 173.94(8)  | O2-Zn2-O6#3   | 101.16(11) |
| O5-Zn1-O1#1                                                       | 115.23(9)  | O2-Zn2-O8     | 108.92(8)  |
| O5-Zn1-O4#2                                                       | 86.00(8)   | O3#5-Zn2-O1W  | 80.07(8)   |
| O5-Zn1-O8#3                                                       | 97.40(8)   | O6#3-Zn2-O1W  | 81.01(9)   |
| O5-Zn1-O8#1                                                       | 132.62(9)  | O6#3-Zn2-O3#5 | 156.31(10) |
| O8#1-Zn1-O1#1                                                     | 112.14(8)  | O6#3-Zn2-O8   | 96.50(8)   |
| O8#1-Zn1-O4#2                                                     | 94.31(8)   | O8-Zn2-O1W    | 148.29(9)  |
| O8#1-Zn1-O8#3                                                     | 79.69(8)   | O8-Zn2-O3#5   | 92.17(8)   |
| #1: 1+x,+y,-1+z; #2: 2-x,1-y,-z; #3: 1-x,2-y,1-z; #4: 1-x,1-y,1-z |            |               |            |

**Table S5** A comparison of CP-based luminescent probes for detection of Fe<sup>3+</sup>

| CP                                                                                        | $K_{sv}$ (M <sup>-1</sup> ) | Linear range (mM <sup>-1</sup> )<br>1) | LOD (M)                       | Ref.      |
|-------------------------------------------------------------------------------------------|-----------------------------|----------------------------------------|-------------------------------|-----------|
| {[Cd <sub>3</sub> (itp) <sub>2</sub> (btc) <sub>2</sub> ]·4H <sub>2</sub> O} <sub>n</sub> | 5.885 × 10 <sup>4</sup>     | 0-0.006                                | 0.12 × 10 <sup>-6</sup>       | S1        |
| [Cd(L1)(DCTP)] <sub>n</sub>                                                               | 6.750 × 10 <sup>3</sup>     | 0-0.1                                  | 2.54 × 10 <sup>-6</sup>       | S2        |
| [Cd(L2)(TPA)] <sub>n</sub>                                                                | 2.6273 × 10 <sup>4</sup>    | 0-0.004                                | 0.99 × 10 <sup>-6</sup>       | S2        |
| [Sr <sub>3</sub> (BPTC) <sub>1.5</sub> (H <sub>2</sub> O) <sub>6.5</sub> ] <sub>n</sub>   | 4.12 × 10 <sup>4</sup>      | 0-0.06                                 | 1 × 10 <sup>-6</sup>          | S3        |
| [Zn(L) <sub>2</sub> ] <sub>n</sub>                                                        | 1.34 × 10 <sup>4</sup>      | 0-0.15                                 | 2.24 × 10 <sup>-6</sup>       | S4        |
| <b>1</b>                                                                                  | 13.55634 × 10 <sup>3</sup>  | 0.02-0.10                              | 4.07 × 10 <sup>-6</sup>       | This work |
| <b>2</b>                                                                                  | 10.54261 × 10 <sup>3</sup>  | 0.02-0.10                              | 1.14 × 10 <sup>-6</sup>       | This work |
| <b>3</b>                                                                                  | 4.97947 × 10 <sup>3</sup>   | 0.02-0.10                              | 40.70 × 10 <sup>-6</sup><br>6 | This work |

## References

- S1 T. Zheng, V. A. Blatov, Y. Zhang, C. Yang, L. Qian, K. Li, B. Li and B. Wu, *J. Lumin.*, 2018, **199**, 126-132.
- S2 M. Wen, S. Wang, D. Liu and G. Dong, *J. Mol. Struct.*, 2021, **1244**, 130954.
- S3 B. Zhao, S. Li, Y. Gu, Q. Sun and H. Liu, *J. Mol. Struct.*, 2022, **1270**, 133944.
- S4 T. Xu, H. Nie, J. Li and Z. Shi, *J. Solid State Chem.*, 2020, **287**, 121342.
